# Supplementary material for: Bacterial levels and diversity in kitchen sponges and dishwashing brushes used by consumers
Source: PubMed Central journal article supplement — J Appl Microbiol. 2022 Jun 7;133(3):1378–91. doi: 10.1111/jam.15621 (PMC9542536; doi:10.1111/jam.15621), 2022-06-07

Supplementary figure 1. Photos of sponges and brushes collected from consumers in Norway and Portugal

| Brushes and sponges collected from Norwegian consumers in first round               |                                                                                     |                                                                                       |
|-------------------------------------------------------------------------------------|-------------------------------------------------------------------------------------|---------------------------------------------------------------------------------------|
|    |    |    |
|   |   |   |
|  |  |  |

|                                                                                                                                     |  |                                                                                                |  |                                                                                                  |
|-------------------------------------------------------------------------------------------------------------------------------------|--|------------------------------------------------------------------------------------------------|--|--------------------------------------------------------------------------------------------------|
|  <p>C111</p>                                       |  |  <p>112</p>   |  |  <p>113</p>   |
|  <p>114</p>                                        |  |  <p>115</p>   |  |  <p>116</p>   |
|  <p>C201</p>                                      |  |  <p>C202</p> |  |  <p>203</p>  |
|  <p>C204</p>                                     |  |  <p>205</p> |  |  <p>206</p> |
| <p><b>Brushes and sponges collected from consumers in Norway in second round, used in experiment where Salmonella was added</b></p> |  |                                                                                                |  |                                                                                                  |

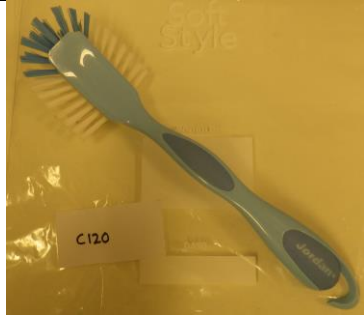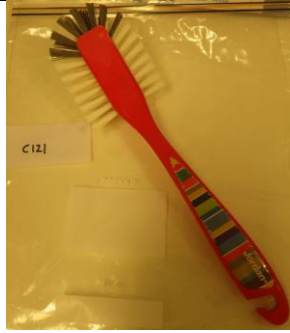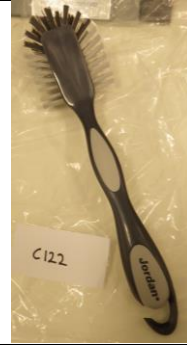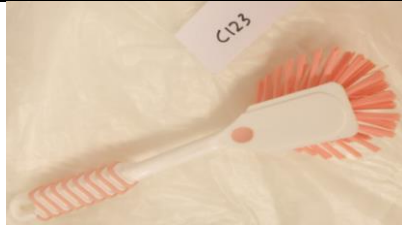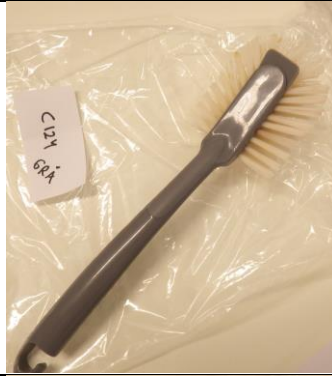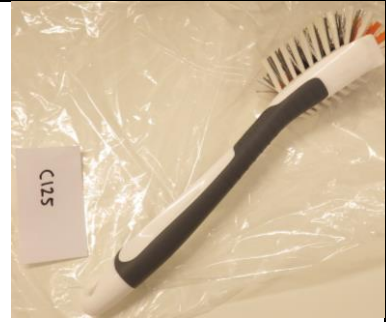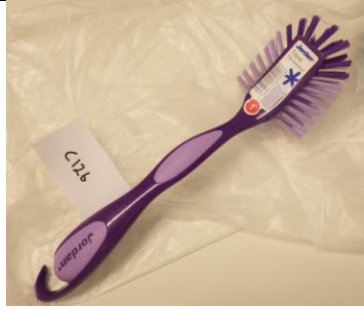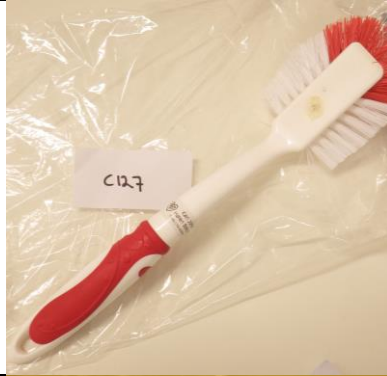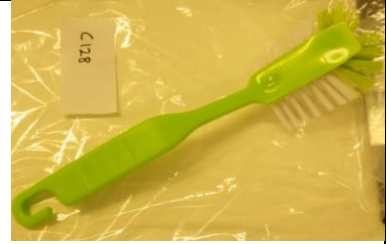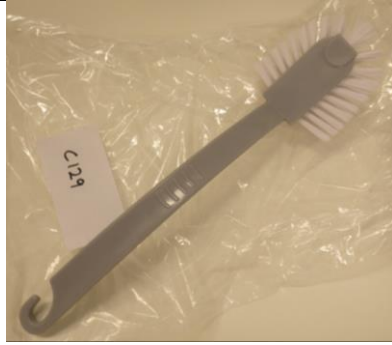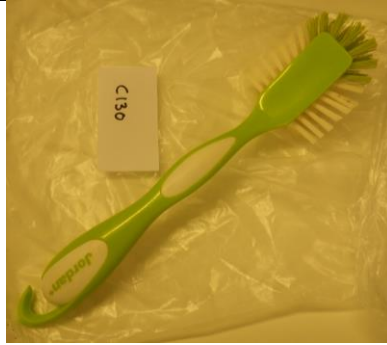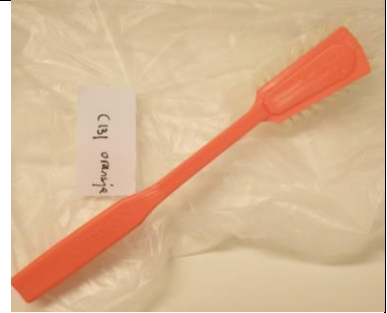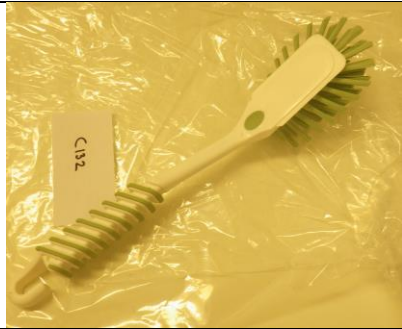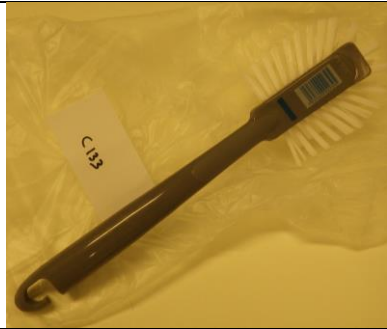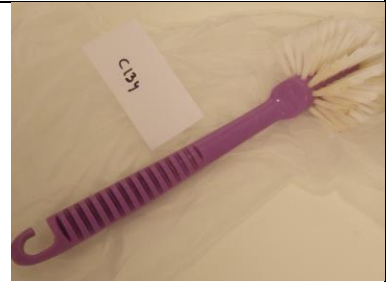

|                                                                                     |                                                                                      |                                                                                       |
|-------------------------------------------------------------------------------------|--------------------------------------------------------------------------------------|---------------------------------------------------------------------------------------|
|    |    |    |
|    |    |    |
|   |   |   |
|  |  |  |
|  |  |                                                                                       |
| <p>Sponges collected from consumers in Portugal, for</p>                            |                                                                                      |                                                                                       |

some sponges photos of both sides are shown

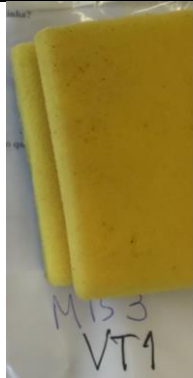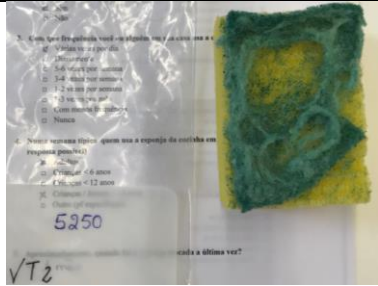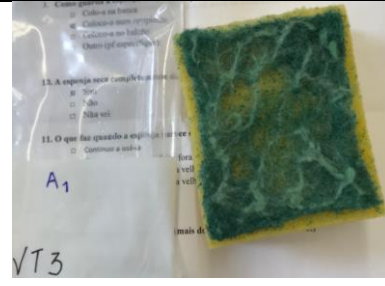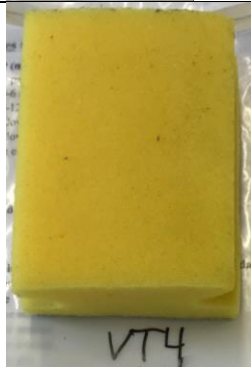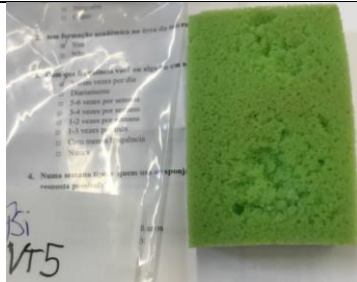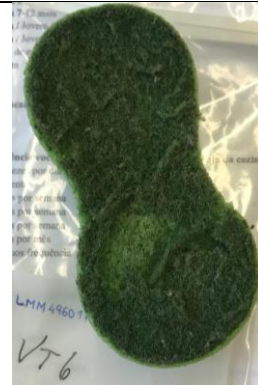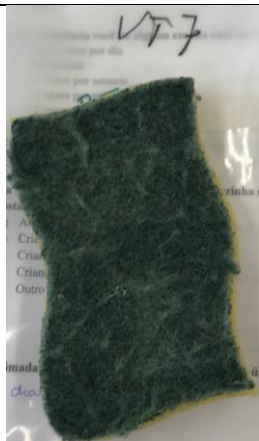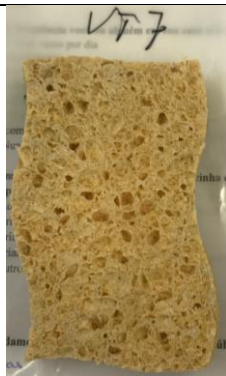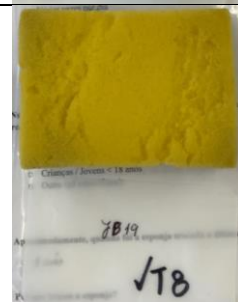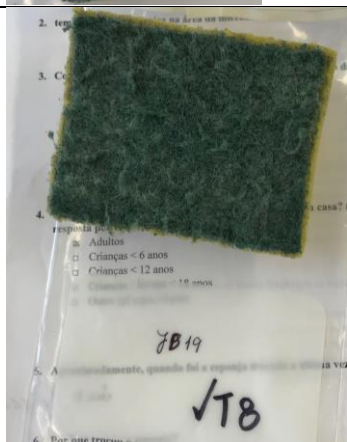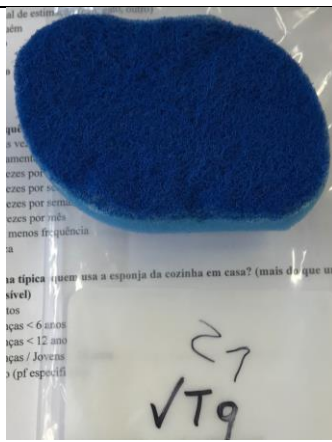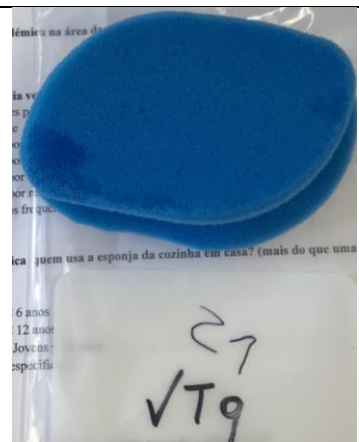



VT20

Algumas questões sobre esponjas

1. C

- Ciliata
- Ciliata
- Ciliata
- Ciliata
- Ciliata
- Nenhum
- Outros

2. tem formação axial

- Sim
- Não

3. Com que frequência

- Várias vezes
- Diariamente
- 3-4 vezes por
- 1-2 vezes por
- 1-2 vezes por
- Com frequência
- Nunca

4. Numa se

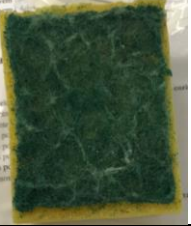

Supplement: JAM-133-1378-s002.pdf [file JAM-133-1378-s002.pdf]
